# Supplementary material
Source: HighWire-hosted journal article supplement (https://www.cmajopen.ca/highwire/filestream/85277/field_highwire_adjunct_files/3/2020-0105-original-submission.pdf)
Supplement: 2020-0105-original-submission.pdf [file 2020-0105-original-submission.pdf]

## Low Uptake of Influenza Vaccination in Immune-mediated Inflammatory Diseases: A Cohort Study

Ruth Ann Marrie<sup>a,b</sup>, MD, PhD, Randy Walld<sup>c</sup> BSc, James M Bolton<sup>d</sup>, MD, Jitender Sareen<sup>d</sup>, MD, Scott B Patten<sup>e</sup>, MD, PhD, Alexander Singer<sup>f</sup>, MD, Lisa M. Lix<sup>b</sup>, PhD, Carol A Hitchon<sup>a</sup>, MD, MSc, James J Marriott<sup>a</sup>, MD, MSc, Renée El-Gabalawy<sup>g,h</sup>, PhD, Alan Katz<sup>b,c,f</sup>, MBChB MSc, John D Fiski, PhD, Charles N Bernstein<sup>a</sup>, MD for the CIHR Team in Defining the Burden and Managing the Effects of Psychiatric Comorbidity in Chronic Immunoinflammatory Disease

- a. Department of Internal Medicine, Max Rady College of Medicine, Rady Faculty of Health Sciences, University of Manitoba, Winnipeg, CAN
- b. Department of Community Health Sciences, Max Rady College of Medicine, Rady Faculty of Health Sciences, University of Manitoba, Winnipeg, CAN
- c. Manitoba Centre for Health Policy, Max Rady College of Medicine, Rady Faculty of Health Sciences, University of Manitoba, Winnipeg, CAN
- d. Department of Psychiatry, Max Rady College of Medicine, Rady Faculty of Health Sciences, University of Manitoba, Winnipeg, CAN
- e. Department of Community Health Sciences, Cumming School of Medicine, University of Calgary, Calgary, CAN
- f. Department of Family Medicine, Max Rady College of Medicine, Rady Faculty of Health Sciences, University of Manitoba, Winnipeg, CAN
- g. Department of Clinical Health Psychology, Max Rady College of Medicine, Rady Faculty of Health Sciences, University of Manitoba, Winnipeg, CAN
- h. Department of Anesthesiology and Perioperative and Pain Medicine, Max Rady College of Medicine, Rady Faculty of Health Sciences, University of Manitoba, Winnipeg, CAN
- i. Departments of Psychiatry, Psychology & Neuroscience, and Medicine, Dalhousie University, Halifax, CAN

Title: 92 characters

Abstract: 249

Text: 2490

References: 39

Tables: 4

Figures: 2

Supplemental: 3 Tables, 1 figure

Corresponding Author:

Ruth Ann Marrie, MD, PhD

Health Sciences Center, GF-543

820 Sherbrook Street

Winnipeg, MB R3A 1R9

Ph: 204-787-4951 Fax: 204-787-1486

[rmarrie@hsc.mb.ca](mailto:rmarrie@hsc.mb.ca)

**Abstract**

**Background:** We examined influenza vaccination uptake in inflammatory bowel disease (IBD), multiple sclerosis (MS) and rheumatoid arthritis (RA), as compared to persons without these immune-mediated inflammatory diseases (IMID), and evaluated the influence of psychiatric comorbidity on vaccine uptake.

**Methods:** Using administrative data from 1984-2015, we conducted a retrospective cohort study in Manitoba, Canada. We identified 10,148 persons with IBD, 6,158 with MS, 16,975 with RA, and 164,152 controls matched on age, sex and region. We identified cohort members with any mood or anxiety disorder (MAD; depression, anxiety disorders, bipolar disorder). We identified influenza vaccinations using tariff (i.e., billing) codes. Using log-binomial regression, we modeled the difference in the proportion of the IMID and matched cohorts vaccinated annually, adjusting for sociodemographics, comorbidity and immune therapy use. We tested additive interaction effects between cohort and psychiatric status.

**Results:** In 2015, 41.3% (40.6-42.0%) of IMID cases received an influenza vaccination, 7.6% more than matched controls (33.7%; 33.4-34.0). After adjustment, participants with an IMID but no MAD had 6.44% (5.79-7.10%) more uptake of vaccination than participants without an IMID. Among participants without an IMID, having a MAD was associated with 4.54% (4.20-4.89%) greater uptake of vaccination. However, we observed a less than additive interaction between IMID and psychiatric status (-1.38%; -2.26 -0.50%).

**Interpretation:** Influenza vaccination uptake is consistently low in IMID populations. While psychiatric morbidity is associated with greater vaccine uptake in Manitobans, it negatively interacts with IMID to reduce uptake. Changes in care delivery are needed to mitigate this gap in care.

## Introduction

Immune-mediated inflammatory diseases (IMID), such as inflammatory bowel disease (IBD), multiple sclerosis (MS) and rheumatoid arthritis (RA), are prevalent in Canada.<sup>1-3</sup> Affected individuals share an increased risk for influenza and related complications.<sup>4</sup> Among 140,480 persons with and without IBD, those with IBD had a 54% increased incidence of influenza, and were more likely to require hospitalization.<sup>5</sup> Persons with MS are more likely to be hospitalized for influenza than persons without MS,<sup>6,7</sup> and influenza increases relapse risk.<sup>8</sup>

Given the elevated risks and adverse impact of influenza in persons with IMID, influenza prevention is important. Effective implementation of influenza vaccination strategies require knowledge of vaccine uptake, and how this varies across population subgroups. However, our understanding of influenza vaccine uptake in IMID populations has been limited by the use of small samples, selection biases, cross-sectional designs, and variable study durations and time periods. Prior findings regarding vaccine uptake in IMID are highly variable.<sup>9-14</sup> A population-based assessment of influenza vaccine uptake in IMID is needed to clarify the extent of this important gap in preventive care.

Serious psychiatric disorders such as schizophrenia are associated with lower uptake of preventive health care such as cervical cancer screening and vaccinations.<sup>15,16</sup> Psychiatric disorders, mainly mood and anxiety disorders (MAD), affect people with IMID more often than people without IMID.<sup>17</sup> While MAD are known to adversely affect health outcomes in IMID, it is unknown whether MAD affect preventive health behaviors such as influenza vaccination. Small studies have suggested that the presence of any comorbidity may increase vaccination uptake,<sup>14</sup> while others have reported no association.<sup>14,18</sup>

We examined uptake of influenza vaccination in population-based cohorts with IBD, MS and RA, as compared to persons without these IMID. We also evaluated the influence of MAD on vaccine uptake in

1  
2  
3 these populations. We focused on IMID that are highly prevalent in Canada, affect individuals across the  
4  
5 age spectrum, affect different organ systems and cared for by different specialists. We considered that if  
6  
7 vaccine uptake is uniformly low across these IMID, this would suggest our findings generalize to other  
8  
9  
10 IMID.

## 11 12 13 **Methods**

### 14 15 16 *Data Sources*

17  
18 This retrospective cohort study was conducted in Manitoba, Canada, which has a population of about  
19  
20 1.3 million. Universal health care is publicly funded, and provided for medically necessary services.  
21  
22 Manitoba Health, the provincial health department, maintains a population registry and health services  
23  
24 databases. We accessed four databases housed in the Manitoba Population Research Data Repository at  
25  
26 the Manitoba Centre for Health Policy including the population registry, Discharge Abstract Database  
27  
28 (DAD), medical services database, and the Drug Program Information Network (DPIN) database. We  
29  
30 linked these databases at the individual level using an encrypted unique identifier. The population  
31  
32 registry captures sex; dates of birth, death and health care coverage; and region of residence (postal  
33  
34 code) for all provincial residents eligible to receive health services. The DAD captures hospitalizations,  
35  
36 admission and discharge dates, and up to 25 diagnoses. Until March 31, 2004, diagnoses were recorded  
37  
38 using the International Classification of Diseases (ICD), 9<sup>th</sup> revision, Clinical Modification (ICD-9-CM)  
39  
40 codes, and by ICD 10<sup>th</sup> revision, Canadian version (ICD-10-CA) codes thereafter. The medical services  
41  
42 database captures the service date, one diagnosis assigned using ICD-9-CM codes, and tariff (i.e., billing)  
43  
44 codes (including for vaccinations). Since 1995, DPIN has captured outpatient prescription dispensations,  
45  
46 including the drug name, drug identification number (DIN) and date; the DIN links to the World Health  
47  
48 Organization's Anatomical Therapeutic Chemical (ATC) Classification System.<sup>12</sup> Except for DPIN, we  
49  
50 accessed data for the period April 1, 1984-March 31, 2016. The University of Manitoba Health Research  
51  
52  
53  
54  
55  
56  
57  
58  
59  
60

1  
2  
3 Ethics Board approved the study. Manitoba's Health Information Privacy Committee approved data  
4  
5 access.  
6  
7

### 8 *Study populations*

9

10  
11 Using validated case definitions, we identified Manitobans with IBD, MS and RA.<sup>19-21</sup> For each case, we  
12  
13 defined the first health claim (hospital, physician, prescription) as the index date. Next, as described  
14  
15 elsewhere,<sup>17</sup> we identified a general population cohort which excluded anyone with ICD-9-CM/ICD-10-  
16  
17 CA codes for IBD, MS or RA, or use of any MS-specific disease-modifying therapies, as these were part of  
18  
19 the MS case definition. Then, we selected up to 5 controls for each case, matched on sex, year of birth  
20  
21 within  $\pm 5$  years, and forward sortation area (first 3 digits of postal code). We assigned controls the  
22  
23 index date of their matched cases.  
24  
25

### 26 *Comorbidity*

27

28  
29 We applied validated case definitions developed in Manitoba to identify members of each cohort  
30  
31 affected by any MAD (which included  $\geq 1$  of depression, anxiety disorders, bipolar disorders) and the  
32  
33 individual disorders comprising MAD.<sup>22</sup> We classified the date of the first claim for each condition as the  
34  
35 diagnosis date. We identified physical comorbidity using the John Hopkins Adjusted Clinical Group  
36  
37 System Aggregated Diagnosis Groups (ADGs), specifically using major physical ADGs which were not  
38  
39 time-limited (ADGs 9, 11, 16, 22 and 32).  
40  
41  
42  
43

### 44 *Covariates*

45

46  
47 We included the following covariates in the regression models: sex (male as reference group), age  
48  
49 (updated annually), socioeconomic status (SES) at the index date, region of residence at the index date,  
50  
51 physical comorbidity (updated annually), IMID-specific procedures (ever), and disease-modifying  
52  
53 therapy use (updated annually). We categorized age as 18-24 [reference group], 25-44, 45-64, and  $\geq 65$   
54  
55  
56  
57  
58  
59  
60

1  
2  
3 years reflecting the emphasis on immunizing individuals in the latter age group. To determine SES we  
4  
5 linked postal code to dissemination-area level census data then calculated the Socioeconomic Factor  
6  
7 Index version 2 (SEFI-2), which incorporates information regarding average household income, percent  
8  
9 of single parent households, unemployment rate and high school education rate; scores less than zero  
10  
11 indicate higher SES.<sup>13</sup> We categorized SES into quintiles (lowest quintile of SES as reference group).  
12  
13  
14 Regions were classified as urban (Winnipeg, population >600,000 and Brandon, population >47,000).  
15  
16 Physical comorbidity was based on ADG scores and categorized as 0 (reference group), 1 or  $\geq 2$ , with  
17  
18 higher scores indicating greater comorbidity. IMID-specific procedures were included as a measure of  
19  
20 disease severity. For IBD these included surgical procedures related to the gastrointestinal resections or  
21  
22 ostomy placement (Table e1), and for RA these included joint-related surgical procedures (Table e2);  
23  
24 there were no relevant procedures for MS. Annually for IBD and RA, immune therapies were categorized  
25  
26 as none (reference group), any biologic (alone or in combination), or any anti-inflammatory or  
27  
28 traditional immunosuppressive therapy or corticosteroids. For MS, disease-modifying therapies were  
29  
30 categorized as none, first-line, or second-line (Table e3).  
31  
32  
33  
34

### 35 *Influenza Vaccination*

36  
37  
38 Annually, we identified influenza vaccinations using tariff codes 8791, 8792 or 8799, which are used by  
39  
40 primary care and pharmacy providers to bill for their services.  
41  
42

### 43 *Analysis*

44  
45  
46 We summarized the characteristics of the cohort using descriptive statistics, including mean (standard  
47  
48 deviation [SD]), median (interquartile range [IQR]), and frequency (percent [%]). We report the crude  
49  
50 percentage of each cohort who had the influenza vaccination annually, along with a 95% confidence  
51  
52 interval (95%CI) based on the binomial distribution. We also report percentages standardized by age and  
53  
54 sex to the 2010 Canadian Census population. Although we accessed data for the period April 1, 1984-  
55  
56  
57  
58  
59  
60

1  
2  
3 March 31, 2016 initially, for regression analyses, we limited the time period to 2006-2016 to reduce  
4 secular trends. We modeled the difference in the proportion immunized annually so that we could  
5 estimate the absolute effects of cohort (IMID vs. matches), and psychiatric comorbidity on this outcome,  
6 as this is more useful for policymakers than relative effects. We used a log-binomial regression model  
7 with generalized estimating equations, accounting for differences in follow-up time by including the log  
8 of person-years as the model offset. Covariates included those defined above. Also, we tested for the  
9 presence of additive interaction effects between cohort and MAD status, where a positive (synergistic  
10 interaction) would indicate the joint effects of cohort and MAD exceeded the sum of their individual  
11 effects, while a negative interaction would indicate the joint effect was less than the sum of their  
12 individual effects. We report differences in percentages and 95%CI. We repeated these analyses for  
13 each cohort (IBD, MS, RA) separately.  
14  
15  
16  
17  
18  
19  
20  
21  
22  
23  
24  
25  
26  
27

28 Statistical analyses were conducted using SAS V9.4 (SAS Institute Inc., Cary NC).  
29  
30  
31  
32  
33

## 34 **Results**

### 35 *Cohorts*

36  
37 We identified 10,148 persons with IBD, 6,158 with MS, and 16,975 with RA and a total of 164,152  
38 matched controls (Table 1). Their characteristics were similar to those of the IMID populations for the  
39 period 2006-2016. Two-thirds of the combined IMID cohort was female. Cases and controls were well-  
40 matched with respect to age, sex, and SES at the index date.  
41  
42  
43  
44  
45  
46  
47  
48  
49

### 50 *Influenza vaccination*

51  
52 The percentage of the combined IMID cases and matched controls who received influenza vaccination  
53 rose over time (Figure 1). However, the percentage of IMID cases who received an influenza vaccination  
54  
55  
56  
57  
58  
59  
60

1  
2  
3 was low regardless of the year, and was comparable across IMIDs after age and sex-standardization  
4  
5 (Figure 2). In 2015, the crude percentage of IMID cases who received an influenza vaccination was 41.3%  
6  
7 (95%CI: 40.6-42.0%), 7.6% more than matched controls (33.7%; 95%CI: 33.4-34.0%).  
8  
9

10 Among IMID cases, those with any MAD (43.7%; 95%CI: 42.8-44.6%) had greater vaccine uptake than  
11  
12 those without a MAD (38.3%; 95%CI: 37.3-39.3%). Similarly, among the matched controls those with a  
13  
14 MAD (37.5%; 95%CI: 37.1-37.9%) had greater vaccine uptake than those without (30.5%; 95%CI: 30.1-  
15  
16 30.9). The percentage of people immunized increased with age, and was highest among those aged  $\geq 65$   
17  
18 years (Figure e1).  
19  
20

### 21 22 *Multivariable analysis* 23

24  
25 On multivariable analysis, participants with an IMID but no MAD had 6.44% (95%CI: 5.79-7.10) more  
26  
27 vaccination uptake than participants without an IMID (Table 2). Among participants without an IMID,  
28  
29 having a MAD was associated with a 4.54% (95%CI: 4.20-4.89%) more vaccination uptake. However, we  
30  
31 observed a less than additive interaction effect between IMID and MAD status (-1.38%; 95%CI: -2.26- -  
32  
33 0.50%). As compared to the highest quintile of SES, participants of lower SES had lower vaccination  
34  
35 uptake. Female as compared to male sex, older age, living in an urban rather than rural region, and an  
36  
37 increased number of physical comorbidities were associated with increased vaccination uptake. Prior  
38  
39 disease-specific surgery (IBD, RA), and use of immune therapies were also associated with increased  
40  
41 uptake.  
42  
43  
44  
45

46 When we conducted analyses for depressive and anxiety disorders, findings were similar to those for  
47  
48 any MAD (Tables 3-4). When we conducted analyses for individual IMIDs, findings in the RA cohort were  
49  
50 similar to those for the combined IMID cohort. Findings in the IBD cohort were similar in magnitude and  
51  
52 direction those in the IMID cohort but did not reach statistical significance. We did not observe a  
53  
54 departure from additivity between the specific IMID diagnosis and MAD in the MS cohort (Tables 2-4).  
55  
56  
57  
58  
59  
60



## Discussion

In this population-based study, vaccination uptake increased over the thirty-year study period in three IMID cohorts, and a matched cohort without IMID, in concert with programmatic changes. In 1999, vaccinations became publicly funded for Manitobans aged  $\geq 65$  years, those with some chronic conditions, and health care workers. In 2005, funding was extended to chronic respiratory disease. However, despite universal vaccination coverage as of 2010, and access via pharmacists as of 2014, vaccination rates in the IMID and matched populations remain much lower than desired. In 2015 only four in ten persons with IMID was vaccinated annually, only slightly better than the three in ten persons without IMID vaccinated. In the matched population, having a MAD was associated with increased vaccination uptake. However, the joint effect of an IMID and comorbid MAD on increasing uptake was negative (less than effect of either factor alone).

The target vaccination rate for high-risk populations and adults aged  $\geq 65$  years in Canada is 80%; vaccination is also recommended in IMID guidelines.<sup>23-25</sup> We found vaccination rates well below this target. In the 2013/2014 Canadian Community Health Survey only 37.8% of adults aged 18-64 years with a chronic medical condition were vaccinated.<sup>26</sup> Findings from prior studies in IBD, MS and RA have been inconsistent. A Polish survey found a 6% uptake of annual influenza vaccination among hospitalized IBD patients,<sup>9</sup> whereas an internet cohort of 958 patients in the Crohn's and Colitis Foundation of America Partners Program self-reported 80% uptake in 2012.<sup>10</sup> Investigation of temporal changes in vaccine uptake has been limited. In Israel, 16.1% of persons with Crohn's disease were vaccinated in 2006; this increased to 38.3% by 2012.<sup>27</sup> Findings were similar in persons with ulcerative colitis, increasing from 21.5% in 2006 to 37.9% in 2012.<sup>28</sup> Reported influenza vaccine uptake also ranges widely in RA,<sup>14,29-31</sup> from 26.6% in a German outpatient clinic in 2011<sup>31</sup> to 85% in two specialty

1  
2  
3 rheumatology centers in the United Kingdom.<sup>14</sup> Comparable findings are more limited in MS. In a  
4 questionnaire-based study in Israel, 37.6% of 101 participants with MS reported receiving the seasonal  
5 flu vaccine during the winter of 2009-2010.<sup>11</sup> In Norway, an immunization register-based study found  
6 that 60.7% of persons with MS received the pandemic (H1N1) vaccine in 2009-2010.<sup>32</sup>  
7  
8  
9

10  
11  
12 We observed a less than additive (negative) interaction between IMID and psychiatric comorbidity on  
13 vaccination uptake in the combined IMID cohort, and in the IBD and RA cohorts. This may reflect  
14 competing demands during physician visits,<sup>33</sup> or reduced adherence to treatment recommendations by  
15 persons with psychiatric disorders, whether pharmacologic,<sup>34-36</sup> or health behaviors.<sup>37</sup> However, we did  
16 not observe a negative interaction in the MS cohort, which may reflect differences in provincial  
17 programs of care for IMID, which are more centralized for MS. Sociodemographic factors associated  
18 with greater vaccine uptake included older age, female sex, higher SES, and urban residence. Greater  
19 disease severity, as evidenced by prior surgeries, medical comorbidities, and use of immune therapies  
20 were also associated with greater uptake. These findings are consistent with those in the Canadian  
21 general population,<sup>26</sup> and earlier studies in IMID populations.<sup>10,27,28</sup>  
22  
23  
24  
25  
26  
27  
28  
29  
30  
31  
32  
33  
34  
35  
36  
37  
38  
39  
40  
41  
42  
43  
44  
45  
46  
47  
48  
49  
50

51  
52 Interventions to improve vaccination rates in IMID populations have been tested. Use of electronic  
53 medical record alerts improved vaccination rates in immunosuppressed rheumatology patients; making  
54 the process nurse-led improved vaccination rates further.<sup>38</sup> A quality improvement project in an IBD  
55 clinic showed that distributing a vaccine questionnaire before clinic, and offering recommended  
56 vaccinations if due increased influenza vaccine uptake from 54% to 81%.<sup>39</sup> Future studies aimed at  
57 improving implementation of such strategies are needed.  
58

59  
60 Study strengths included the population-based design, application of validated case definitions for IMID  
and psychiatric comorbidity, and extended time period. Conduct of the study in one province was a  
limitation. However, in the 2013/2014 Canadian Community Health Survey, the proportion of individuals

1  
2  
3 vaccinated was similar across provinces, apart from Nova Scotia (47.9%), Quebec (25.4%) and  
4  
5 Newfoundland (27.6%). This suggests that our findings are generalizable in Canada although they may  
6  
7 not be generalizable to jurisdictions with alternate models of health care delivery. We may not have  
8  
9 identified all vaccinations administered due to use of tariff codes, but under-ascertainment is likely to be  
10  
11 non-differential between cohorts, and would be insufficient to fully account for our findings. We lacked  
12  
13 clinical characteristics regarding the IMID, but included some measures of disease severity and  
14  
15 treatment status.  
16  
17

18  
19 Influenza vaccination uptake is lower than desired in vulnerable IMID populations. Given the increased  
20  
21 susceptibility of IMID populations to influenza and related complications, it is essential that action be  
22  
23 taken to ameliorate this gap in preventive care. Although having a MAD was associated with increased  
24  
25 influenza vaccine uptake in Manitobans without IMID, comorbid MAD interacted negatively with IMID.  
26  
27 This suggests that the association of psychiatric comorbidity with other preventive health behaviors  
28  
29 should also be evaluated in IMID.  
30  
31  
32  
33  
34  
35  
36

### 37 **Acknowledgement**

38  
39 This study was funded by the Canadian Institutes of Health Research (THC-135234), Crohn's and Colitis  
40  
41 Canada and the Waugh Family Chair in Multiple Sclerosis (to RAM). Dr Bernstein is supported in part by  
42  
43 the Bingham Chair in Gastroenterology. Dr. Sareen is supported by CIHR #333252. Dr. Lix is supported by  
44  
45 a Canada Research Chair. Dr. El-Gabalawy is supported by University of Manitoba Start-Up Funding.  
46  
47  
48

49 The sponsors had no role in the design and conduct of the study; collection, management, analysis, and  
50  
51 interpretation of the data; and preparation, review, or approval of the manuscript. The use of  
52  
53 Aggregated Diagnosis Groups™ (ADGs™) codes for risk adjustment in regression models were created  
54  
55 using The Johns Hopkins Adjusted Clinical Group® (ACG®) Case-Mix System version 9. The authors  
56  
57  
58  
59  
60

1  
2  
3 acknowledge the Manitoba Centre for Health Policy for use of the Population Health Research Data  
4  
5 Repository under project #2014-030 (HIPC #2014/2015-19A). The results and conclusions presented are  
6  
7 those of the authors and no official endorsement by the Manitoba Centre for Health Policy, Manitoba  
8  
9 Health, or other data providers is intended or should be inferred.  
10

11  
12 Members of the CIHR Team in Defining the Burden and Managing the Effects of Psychiatric Comorbidity  
13  
14 in Chronic Immunoinflammatory Disease are: Ruth Ann Marrie, James M Bolton, Jitender Sareen, John R  
15  
16 Walker‡, Scott B Patten, Alexander Singer, Lisa M. Lix, Carol A Hitchon, Renée El-Gabalawy, PhD, Alan  
17  
18 Katz, John D Fisk, Charles N Bernstein, Lesley Graff, Lindsay Berrigan, Ryan Zarychanski, Christine  
19  
20 Peschken, James J Marriott  
21  
22

23  
24  
25 ‡Deceased.  
26  
27  
28  
29

### 30 **Author Contributions**

31  
32  
33 RAM, JB, JS, SB, LML, CAH, JJM, AK, JDF and CNB obtained study funding and designed the study. RW  
34  
35 analyzed the data and all authors interpreted the data. RAM drafted the manuscript. All other authors  
36  
37 revised the manuscript and approved submission.  
38  
39

### 40 **Competing Interests**

41  
42  
43 Ruth Ann Marrie receives research funding from: CIHR, Research Manitoba, Multiple Sclerosis Society of  
44  
45 Canada, Multiple Sclerosis Scientific Foundation, Crohn's and Colitis Canada, National Multiple Sclerosis  
46  
47 Society, CMSC. She is supported by the Waugh Family Chair in Multiple Sclerosis.  
48  
49

50  
51 Randy Walld reports no disclosures.  
52  
53  
54  
55  
56  
57  
58  
59  
60

1  
2  
3 James Bolton receives research funding from CIHR, Brain and Behavior Research Foundation and the MS  
4 Society of Canada.  
5

6  
7  
8 Jitender Sareen receives research funding from CIHR and holds stocks in Johnson and Johnson.  
9

10  
11 Scott Patten receives research funding from CIHR, the MS Society of Canada, Roche, Biogen and the  
12 Government of Alberta.  
13

14  
15  
16 Alexander Singer has received financial and in-kind support from an IBM/CIMVHR Advanced Analytics  
17 Grant and Calian Inc.  
18

19  
20 Lisa Lix receives research funds from CIHR and the Arthritis Society.  
21

22  
23 Carol Hitchon has research funds for unrelated studies from UCB Canada and Pfizer.  
24

25  
26  
27 Renee El-Gabalawy receives research funds from CIHR, University of Manitoba Start-Up Funds.  
28

29  
30 Alan Katz receives research funds from CIHR, the Heart and Stroke Foundation and Research Manitoba.  
31

32  
33 John Fisk receives research funds from CIHR, the MS Society of Canada, the Nova Scotia Health Authority  
34 Research Fund and the Dalhousie Medical Fund.  
35

36  
37  
38 James Marriott has conducted clinical trials for Biogen Idec and Roche, and receives research funding  
39 from the MS Society of Canada, the MS Scientific Foundation and Research Manitoba.  
40

41  
42  
43 Charles Bernstein has consulted to Abbvie Canada, Janssen Canada, Pfizer Canada, Shire Canada, Takeda  
44 Canada, and has received unrestricted educational grants from Abbvie Canada, Janssen Canada, Shire  
45 Canada and Takeda Canada. He has been on speaker's bureaus of Abbvie Canada and Shire Canada.  
46  
47  
48  
49

50  
51 **Data Sharing**  
52  
53  
54  
55  
56  
57  
58  
59  
60

1  
2  
3  
4  
5  
6  
7  
8  
9  
10  
11  
12  
13  
14  
15  
16  
17  
18  
19  
20  
21  
22  
23  
24  
25  
26  
27  
28  
29  
30  
31  
32  
33  
34  
35  
36  
37  
38  
39  
40  
41  
42  
43  
44  
45  
46  
47  
48  
49  
50  
51  
52  
53  
54  
55  
56  
57  
58  
59  
60

As we are not the data custodians, we are not authorized to make the data used in this study available.

With the appropriate approvals, the data can be accessed through the Manitoba Centre for Health Policy.

Confidential

## References

1. Bernstein CN, Wajda A, Svenson LW, et al. The epidemiology of inflammatory bowel disease in Canada: a population-based study. *Am J Gastroenterol*. 2006;101:1559-68.
2. Health Canada. *Arthritis in Canada: An ongoing challenge*. Ottawa: Health Canada;2003.
3. Evans C, Beland S, Kulaga S, et al. Incidence and prevalence of multiple sclerosis in the Americas: a systematic review. *Neuroepidemiology*. 2013;40:195-210.
4. Blumentals WA, Arreglado A, Napalkov P, Toovey S. Rheumatoid arthritis and the incidence of influenza and influenza-related complications: a retrospective cohort study. *BMC Musculoskeletal Disorders*. 2012;13:158.
5. Tinsley A, Navabi S, Williams ED, et al. Increased Risk of Influenza and Influenza-Related Complications Among 140,480 Patients With Inflammatory Bowel Disease. *Inflammatory Bowel Diseases*. 2018;25:369-76.
6. Montgomery S, Hillert J, Bahmanyar S. Hospital admission due to infections in multiple sclerosis patients. *European Journal of Neurology*. 2013;20:1153-60.
7. Marrie RA, Elliott L, Marriott J, et al. Dramatically changing rates and reasons for hospitalization in multiple sclerosis. *Neurology*. 2014;83:929-37.
8. De Keyser J, Zwanikken C, Boon M. Effects of influenza vaccination and influenza illness on exacerbations in multiple sclerosis. *J Neurol Sci*. 1998;159:51-3.
9. Waszczuk K, Waszczuk E, Szenborn L. Can we better protect patients with inflammatory bowel disease against infections - patient attitude and personal immunization knowledge. *Acta Gastroenterol Belg*. 2018;81:257-61.

- 1  
2  
3 10. Wasan SK, Calderwood AH, Long MD, Kappelman MD, Sandler RS, Farraye FA. Immunization  
4 rates and vaccine beliefs among patients with inflammatory bowel disease: an opportunity for  
5 improvement. *Inflammatory Bowel Diseases*. 2014;20:246-50.  
6  
7
- 8  
9 11. Auriel E, Gadoth A, Regev K, Karni A. Seasonal and H1N1v influenza vaccines in MS: safety and  
10 compliance. *J Neurol Sci*. 2012;314:102-3.  
11  
12
- 13 12. WHO Collaborating Centre for Drug Statistics Methodology. Anatomic Therapeutic Chemical  
14 Classification System. 2011; [http://www.whocc.no/atc/structure\\_and\\_principles/](http://www.whocc.no/atc/structure_and_principles/). Accessed  
15 August 9, 2012.  
16  
17
- 18 13. Chateau D, Metge C, Prior H, Soodeen RA. Learning from the census: the Socio-economic Factor  
19 Index (SEFI) and health outcomes in Manitoba. *Can J Public Health*. 2012;103:S23-7.  
20  
21
- 22 14. Subesinghe S, Rutherford AI, Ibrahim F, Harris H, Galloway J. A large two-centre study in to rates  
23 of influenza and pneumococcal vaccination and infection burden in rheumatoid arthritis in the  
24 UK. *BMC Musculoskeletal Disorders*. 2016;17:322.  
25  
26
- 27 15. Martens PJ, Chochinov HM, Prior HJ, Fransoo R, Burland E. Are cervical cancer screening rates  
28 different for women with schizophrenia? A Manitoba population-based study. *Schizophrenia  
29 Research*. 2009;113:101-6.  
30  
31
- 32 16. Lord O, Malone D, Mitchell AJ. Receipt of preventive medical care and medical screening for  
33 patients with mental illness: a comparative analysis. *General Hospital Psychiatry*. 2010;32:519-  
34 43.  
35  
36
- 37 17. Marrie RA, Walld R, Bolton JM, et al. Increased incidence of psychiatric disorders in immune-  
38 mediated inflammatory disease. *Journal of Psychosomatic Research*. 2017;101:17-23.  
39  
40
- 41 18. Pham HV, Hasan I, Udaltsova N, et al. Rates and Predictors of Vaccinations Among Inflammatory  
42 Bowel Disease Patients Receiving Anti-Tumor Necrosis Factor Agents. *Digestive Diseases and  
43 Sciences*. 2018;63:209-17.  
44  
45  
46  
47  
48  
49  
50  
51  
52  
53  
54  
55  
56  
57  
58  
59  
60



- 1  
2  
3 19. Bernstein CN, Blanchard JF, Rawsthorne P, Wajda A. Epidemiology of Crohn's Disease and  
4  
5 Ulcerative Colitis in a central Canadian Province: A population-based study. *Am J Epidemiol.*  
6  
7 1999;149:916-24.  
8
- 9  
10 20. Al-Sakran LH, Marrie RA, Blackburn DF, Knox KB, Evans CD. Establishing the Incidence and  
11  
12 Prevalence of Multiple Sclerosis in Saskatchewan. *The Canadian Journal of Neurological*  
13  
14 *Sciences.* . 2018;45:295-303.  
15
- 16 21. Hitchon CA, Khan S, Elias B, Lix LM, Peschken CA. Prevalence and Incidence of Rheumatoid  
17  
18 Arthritis in Canadian First Nations and Non-First Nations People: A Population-Based Study. *J*  
19  
20 *Clin Rheumatol.* 2019.  
21
- 22 22. Marrie RA, Fisk JD, Yu BN, et al. Mental comorbidity and multiple sclerosis: validating  
23  
24 administrative data to support population-based surveillance. *BMC Neurology.* 2013;13:16.  
25  
26
- 27 23. Farraye FA, Melmed GY, Lichtenstein GR, Kane SV. ACG Clinical Guideline: Preventive Care in  
28  
29 Inflammatory Bowel Disease. *The American Journal of Gastroenterology.* 2017;112:241-58.  
30  
31
- 32 24. Farez MF, Correale J, Armstrong MJ, et al. Practice guideline update summary: Vaccine-  
33  
34 preventable infections and immunization in multiple sclerosis. *Report of the Guideline*  
35  
36 *Development, Dissemination, and Implementation Subcommittee of the American Academy of*  
37  
38 *Neurology.* 2019;93:584-94.  
39  
40
- 41 25. Furer V, Rondaan C, Heijstek MW, et al. 2019 update of EULAR recommendations for vaccination  
42  
43 in adult patients with autoimmune inflammatory rheumatic diseases. *Ann Rheum Dis.*  
44  
45 2019:annrheumdis-2019-215882.  
46  
47
- 48 26. Roy M, Sherrard L, Dube E, Gilbert NL. Determinants of non-vaccination against seasonal  
49  
50 influenza. *Health Reports.* 2018;29:12-22.  
51  
52  
53  
54  
55  
56  
57  
58  
59  
60

- 1  
2  
3 27. Boltin D, Gingold-Belfer R, Kimchi NA, Ben-Bassat O, Niv Y, Birkenfeld S. Utilization of influenza  
4 immunization in adults with Crohn's disease-a longitudinal, population-based study.  
5  
6 *Inflammatory Bowel Diseases*. 2014;20:240-5.  
7  
8  
9  
10 28. Boltin D, Gingold-Belfer R, Kimchi NA, et al. Uptake of influenza vaccine in ulcerative colitis.  
11  
12 *Vaccine*. 2014;32:5484-9.  
13  
14 29. Qendro T, de la Torre ML, Panopalis P, et al. Suboptimal immunization coverage among  
15  
16 Canadian rheumatology patients in routine clinical care. *The Journal of Rheumatology*.  
17  
18 2019;jrheum.181376.  
19  
20  
21 30. Costello R, Winthrop KL, Pye SR, Brown B, Dixon WG. Influenza and Pneumococcal Vaccination  
22  
23 Uptake in Patients with Rheumatoid Arthritis Treated with Immunosuppressive Therapy in the  
24  
25 UK: A Retrospective Cohort Study Using Data from the Clinical Practice Research Datalink. *PLoS*  
26  
27 *One*. 2016;11:e0153848.  
28  
29  
30 31. Krasselt M, Ivanov JP, Baerwald C, Seifert O. Low vaccination rates among patients with  
31  
32 rheumatoid arthritis in a German outpatient clinic. *Rheumatol Int*. 2017;37:229-37.  
33  
34  
35 32. Ghaderi S, Berg-Hansen P, Bakken IJ, Magnus P, Trogstad L, Haberg SE. Hospitalization following  
36  
37 influenza infection and pandemic vaccination in multiple sclerosis patients: a nationwide  
38  
39 population-based registry study from Norway. *Eur J Epidemiol*. 2019.  
40  
41  
42 33. Szilagyi PG, Shone LP, Barth R, et al. Physician practices and attitudes regarding adult  
43  
44 immunizations. *Preventive Medicine*. 2005;40:152-61.  
45  
46  
47 34. Nigro G, Angelini G, Grosso SB, Caula G, Sategna-Guidetti C. Psychiatric predictors of  
48  
49 noncompliance in inflammatory bowel disease: psychiatry and compliance. *Journal of clinical*  
50  
51 *gastroenterology*. 2001;32:66-8.  
52  
53  
54  
55  
56  
57  
58  
59  
60

- 1  
2  
3 35. Mohr DC, Goodkin DE, Likosky W, Gatto N, Baumann KA, Rudick RA. Treatment of depression  
4 improves adherence to interferon beta-1b therapy for multiple sclerosis. *Arch Neurol*.  
5  
6 1997;54:531-3.  
7  
8  
9  
10 36. Tarrants M, Oleen-Burkey M, Castelli-Haley J, Lage MJ. The Impact of Comorbid Depression on  
11  
12 Adherence to Therapy for Multiple Sclerosis. *Multiple Sclerosis International*. 2011;2011:10.  
13  
14 37. DiMatteo MR, Lepper HS, Croghan TW. Depression Is a Risk Factor for Noncompliance With  
15  
16 Medical Treatment: Meta-analysis of the Effects of Anxiety and Depression on Patient  
17  
18 Adherence. *Archives of Internal Medicine*. 2000;160:2101-7.  
19  
20  
21 38. Ledwich LJ, Harrington TM, Ayoub WT, Sartorius JA, Newman ED. Improved influenza and  
22  
23 pneumococcal vaccination in rheumatology patients taking immunosuppressants using an  
24  
25 electronic health record best practice alert. *Arthritis Care Res*. 2009;61:1505-10.  
26  
27  
28 39. Parker S, Chambers White L, Spangler C, et al. A quality improvement project significantly  
29  
30 increased the vaccination rate for immunosuppressed patients with IBD. *Inflammatory Bowel*  
31  
32 *Diseases*. 2013;19:1809-14.  
33  
34  
35  
36  
37  
38  
39  
40  
41  
42  
43  
44  
45  
46  
47  
48  
49  
50  
51  
52  
53  
54  
55  
56  
57  
58  
59  
60

1  
2  
3  
4  
5  
6  
7  
8  
9  
10  
11  
12  
13  
14  
15  
16  
17  
18  
19  
20  
21  
22  
23  
24  
25  
26  
27  
28  
29  
30  
31  
32  
33  
34  
35  
36  
37  
38  
39  
40  
41  
42  
43  
44  
45  
46  
47

Table 1. Characteristics of prevalent disease cohorts at the time of diagnosis, and matched cohorts at the matched index date.

| Characteristic                                                  | IBD matches<br>(n = 50704) | IBD<br>(n = 10148)   | MS matches<br>(n = 30690) | MS<br>(n = 6158)     | RA matches<br>(n = 84756) | RA<br>(n = 16975)    | IMID <sup>a</sup><br>(n = 32880) | IMID matches<br>(n = 164152) |
|-----------------------------------------------------------------|----------------------------|----------------------|---------------------------|----------------------|---------------------------|----------------------|----------------------------------|------------------------------|
| <b>Whole population, 1984-2015</b>                              |                            |                      |                           |                      |                           |                      |                                  |                              |
| Female, n (%)                                                   | 27663 (54.6)               | 5536 (54.6)          | 21564 (70.3)              | 4322 (70.2)          | 61231 (72.2)              | 12263 (72.2)         | 21841 (66.4)                     | 65185 (66.7)                 |
| Age at diagnosis, mean (SD)                                     | 41.7 (17.0)                | 41.7 (17.0)          | 42.1 (13.5)               | 42.1 (13.5)          | 54.0 (16.1)               | 54.0 (16.1)          | 48.0 (17.1)                      | 48.0 (17.1)                  |
| Duration of follow-up from the index date (years), median (IQR) | 11.9<br>(4.92, 21.8)       | 13.3<br>(5.93, 22.8) | 13.9<br>(5.91, 23.6)      | 13.9<br>(6.28, 22.5) | 11.1<br>(4.93, 19.3)      | 11.4<br>(5.51, 19.0) | 12.4<br>(5.79, 20.7)             | 11.9<br>(5.12, 20.8)         |
| Urban region of residence, n (%)                                | 33799 (66.7)               | 6763 (66.6)          | 20685 (67.4)              | 4154 (67.5)          | 50281 (59.3)              | 10070 (59.3)         | 20727 (63.0)                     | 103468 (63.0)                |
| Socioeconomic status <sup>a</sup>                               | -0.23 (0.88)               | -0.26 (0.91)         | -0.22 (0.88)              | -0.25 (0.91)         | 0.06 (1.01)               | 0.03 (1.03)          | -0.11 (0.99)                     | -0.08 (0.96)                 |
| <b>Comorbidity status at study start, n (%)</b>                 |                            |                      |                           |                      |                           |                      |                                  |                              |
| No. ADGs                                                        |                            |                      |                           |                      |                           |                      |                                  |                              |
| 0                                                               | 42318 (83.5)               | 6749 (66.5)          | 26373 (85.9)              | 4389 (71.3)          | 65883 (77.7)              | 11216 (66.1)         | 22275 (67.7)                     | 133038 (81.0)                |
| 1                                                               | 7246 (14.3)                | 2789 (27.5)          | 3763 (12.3)               | 1392 (22.6)          | 15605 (18.4)              | 4643 (27.4)          | 8561 (26.0)                      | 26227 (16.0)                 |
| ≥2                                                              | 1140 (2.2)                 | 610 (6.0)            | 554 (1.8)                 | 377 (6.1)            | 3268 (3.9)                | 1116 (6.6)           | 2044 (6.2)                       | 4887 (3.0)                   |
| Any Common Mental Disorder                                      | 10979 (21.7)               | 3147 (31.0)          | 7431 (24.2)               | 2485 (40.4)          | 22078 (26.1)              | 5735 (33.8)          | 11171 (34.0)                     | 39911 (24.3)                 |
| Depression                                                      | 9590 (18.9)                | 2764 (27.2)          | 6546 (21.3)               | 2197 (35.7)          | 18853 (22.2)              | 4864 (28.7)          | 9645 (29.3)                      | 34480 (21.0)                 |
| Anxiety disorder                                                | 13438 (26.5)               | 3453 (34.0)          | 8931 (29.1)               | 2378 (38.6)          | 25922 (30.6)              | 6074 (35.8)          | 11707 (35.6)                     | 47639 (29.0)                 |

|                                                    |                    |                   |                    |                   |                    |                    |                     |                    |
|----------------------------------------------------|--------------------|-------------------|--------------------|-------------------|--------------------|--------------------|---------------------|--------------------|
| Bipolar disorder                                   | 1562 (3.1)         | 548 (5.4)         | 1151 (3.8)         | 368 (6.0)         | 2963 (3.5)         | 716 (4.2)          | 1602 (4.9)          | 5583 (3.4)         |
| <b>Population, 2006-2016</b>                       |                    |                   |                    |                   |                    |                    |                     |                    |
|                                                    | <b>IBD matches</b> | <b>IBD</b>        | <b>MS matches</b>  | <b>MS</b>         | <b>RA matches</b>  | <b>RA</b>          | <b>IMID matches</b> | <b>IMID</b>        |
|                                                    | <b>(n = 40364)</b> | <b>(n = 8458)</b> | <b>(n = 24154)</b> | <b>(n = 4748)</b> | <b>(n = 64510)</b> | <b>(n = 12714)</b> | <b>(n = 127310)</b> | <b>(n = 25832)</b> |
| Female, n (%)                                      | 22207 (55.0)       | 4623 (54.7)       | 17247 (71.4)       | 3399 (71.6)       | 47102 (73.0)       | 9458 (72.8)        | 85349 (67.0)        | 8602 (33.3)        |
| Age at diagnosis, mean (SD)                        | 41.2 (16.2)        | 41.0 (16.2)       | 40.9 (12.2)        | 40.2 (11.9)       | 51.8 (15.2)        | 51.4 (15.4)        | 46.4 (16.0)         | 45.9 (16.0)        |
| Urban region of residence, n (%)                   | 26558 (65.8)       | 5574 (65.9)       | 15925 (65.9)       | 3153 (66.4)       | 37559 (58.2)       | 7609 (58.6)        | 78949 (62.0)        | 16104 (62.3)       |
| Socioeconomic status <sup>a</sup>                  | -0.22 (0.85)       | -0.26 (0.89)      | -0.21 (0.85)       | -0.25 (0.89)      | 0.06 (1.0)         | 0.04 (1.0)         | -0.08 (0.95)        | -0.11 (0.98)       |
| <b>Comorbidity status at the index date, n (%)</b> |                    |                   |                    |                   |                    |                    |                     |                    |
| No. ADGs                                           |                    |                   |                    |                   |                    |                    |                     |                    |
| 0                                                  | 33895 (84.0)       | 5546 (65.6)       | 20903 (86.5)       | 3371 (71.0)       | 51284 (79.5)       | 8594 (66.2)        | 104753 (82.3)       | 17434 (67.5)       |
| 1                                                  | 5638 (14.0)        | 2390 (28.2)       | 2892 (12.0)        | 1089 (22.9)       | 11140 (17.3)       | 3577 (27.5)        | 19340 (15.2)        | 6827 (24.2)        |
| ≥2                                                 | 831 (2.0)          | 522 (6.2)         | 359 (1.5)          | 288 (6.1)         | 2086 (3.2)         | 813 (6.3)          | 3217 (2.5)          | 1571 (6.1)         |
| Any Mood and Anxiety Disorder                      | 9108 (22.6)        | 2669 (31.6)       | 6119 (25.3)        | 1985 (41.8)       | 17008 (26.4)       | 4490 (34.6)        | 31739 (24.9)        | 8960 (34.7)        |
| Depression                                         | 7992 (19.8)        | 2343 (27.7)       | 5410 (22.4)        | 1742 (36.7)       | 14548 (22.6)       | 3808 (29.3)        | 27517 (21.6)        | 7723 (29.)         |
| Anxiety disorder                                   | 11444 (28.4)       | 2980 (35.2)       | 7543 (31.2)        | 1983 (41.8)       | 21332 (33.1)       | 5063 (39.0)        | 39735 (31.2)        | 9839 (38.1)        |
| Bipolar disorder                                   | 1326 (3.3)         | 465 (5.5)         | 968 (4.0)          | 301 (6.3)         | 2347 (3.6)         | 575 (4.4)          | 4559 (3.6)          | 1312 (5.1)         |

IBD = inflammatory bowel disease, MS = multiple sclerosis, RA = rheumatoid arthritis, IMID = immune-mediated inflammatory disease, combining IBD, MS and RA cohorts; a-Socioeconomic status = Socioeconomic Factor Index scores; values less than zero indicate higher

1  
2  
3  
4  
5  
6  
7  
8  
9  
10  
11  
12  
13  
14  
15  
16  
17  
18  
19  
20  
21  
22  
23  
24  
25  
26  
27  
28  
29  
30  
31  
32  
33  
34  
35  
36  
37  
38  
39  
40  
41  
42  
43  
44  
45  
46  
47

socioeconomic status; a- A small number of individuals met the case definitions for more than one of the IMIDs of interest. We did not exclude them to ensure generalizability of our findings but only allowed them to account once in the IMID cohort. In this situation, there were classified on the basis of the IMID with the earliest index date in the coverage period.

Confidential

Table 2. Association of immune-mediated inflammatory disease (IMID), any mood or anxiety disorder (MAD) and uptake of influenza vaccination (Percentage; 95% confidence interval)

| Variable                                    | IMID                              | IBD                               | MS                                | RA                                |
|---------------------------------------------|-----------------------------------|-----------------------------------|-----------------------------------|-----------------------------------|
| Cohort effect, absent a MAD effect          | 6.44<br>(5.79, 7.10)              | 7.19<br>(6.12, 8.26)              | 6.70<br>(5.13, 8.27)              | 5.61<br>(4.64, 6.59)              |
| MAD effect absent a cohort effect           | 4.54<br>(4.20, 4.89)              | 5.10<br>(4.52, 5.68)              | 5.31<br>(4.53, 6.09)              | 3.74<br>(3.23, 4.26)              |
| Joint effect (cohort & MAD)*                | 5.06 <sup>a</sup><br>(4.39, 5.74) | 5.76 <sup>b</sup><br>(4.55, 6.98) | 6.78 <sup>c</sup><br>(5.29, 8.27) | 3.72 <sup>d</sup><br>(2.76, 4.68) |
| Age                                         |                                   |                                   |                                   |                                   |
| 18-24                                       | 0                                 | 0                                 | 0                                 | 0                                 |
| 25-44                                       | 6.12<br>(5.59, 6.64)              | 5.61<br>(4.98, 6.24)              | 6.94<br>(5.47, 8.40)              | 5.56<br>(4.41, 6.71)              |
| 45-64                                       | 15.1<br>(14.6, 15.7)              | 14.0<br>(13.3, 14.7)              | 15.2<br>(13.7, 16.6)              | 15.0<br>(13.8, 16.1)              |
| ≥65                                         | 33.3<br>(32.7, 33.9)              | 33.8<br>(32.9, 34.7)              | 32.6<br>(31.0, 34.3)              | 32.3<br>(31.1, 33.5)              |
| Sex                                         |                                   |                                   |                                   |                                   |
| Male                                        | 0                                 | 0                                 | 0                                 | 0                                 |
| Female                                      | 4.97<br>(4.64, 5.29)              | 4.92<br>(4.41, 5.43)              | 3.66<br>(2.90, 4.42)              | 4.61<br>(4.09, 5.13)              |
| Region                                      |                                   |                                   |                                   |                                   |
| Rural                                       | 0                                 | 0                                 | 0                                 | 0                                 |
| Urban                                       | 2.16<br>(1.83, 2.49)              | 1.88<br>(1.35, 2.40)              | 2.28<br>(1.52, 3.04)              | 2.56<br>(2.06, 3.06)              |
| Socioeconomic status                        |                                   |                                   |                                   |                                   |
| Quintile 1 (lowest)                         | -4.69<br>(-5.19, -4.19)           | -4.66<br>(-5.48, -3.84)           | -3.38<br>(-4.52, -2.23)           | -6.03<br>(-6.82, -5.25)           |
| Quintile 2                                  | -3.74<br>(-4.25, -3.23)           | -4.00<br>(-4.79, -3.22)           | -3.45<br>(-4.57, -2.34)           | -4.01<br>(-4.83, -3.18)           |
| Quintile 3                                  | -3.09<br>(-3.61, -2.58)           | -3.40<br>(-4.18, -2.61)           | -2.74<br>(-3.85, -1.63)           | -3.39<br>(-4.23, -2.55)           |
| Quintile 4                                  | -2.25<br>(-2.75, -1.75)           | -2.16<br>(-2.93, -1.39)           | -2.21<br>(-3.30, -1.12)           | -2.66<br>(-3.49, -1.84)           |
| Quintile 5 (highest)                        | 0                                 | 0                                 | 0                                 | 0                                 |
| Comorbidity                                 |                                   |                                   |                                   |                                   |
| 0                                           | 0                                 | 0                                 | 0                                 | 0                                 |
| 1                                           | 4.77<br>(4.32, 5.22)              | 3.43<br>(2.69, 4.16)              | 3.78<br>(2.68, 4.87)              | 5.66<br>(5.01, 6.30)              |
| ≥2                                          | 8.67<br>(7.60, 9.74)              | 8.64<br>(6.61, 10.7)              | 8.96<br>(6.10, 11.8)              | 8.34<br>(6.95, 9.72)              |
| IMID-specific procedure                     | 4.94<br>(4.21, 5.67)              | 6.90<br>(5.58, 8.22)              | -                                 | 4.00<br>(3.12, 4.88)              |
| Immune therapy                              |                                   |                                   |                                   |                                   |
| None                                        | 0                                 | 0                                 | 0                                 | 0                                 |
| Anti-inflammatory/immune-modulatory therapy | 3.09<br>(2.73, 3.46)              | 2.95<br>(2.39, 3.52)              | 4.43<br>(2.53, 6.32)              | 3.07<br>(2.58, 3.56)              |

1  
2  
3  
4  
5  
6  
7  
8  
9  
10  
11  
12  
13  
14  
15  
16  
17  
18  
19  
20  
21  
22  
23  
24  
25  
26  
27  
28  
29  
30  
31  
32  
33  
34  
35  
36  
37  
38  
39  
40  
41  
42  
43  
44  
45  
46  
47  
48  
49  
50  
51  
52  
53  
54  
55  
56  
57  
58  
59  
60

|              |                      |                      |                      |                      |
|--------------|----------------------|----------------------|----------------------|----------------------|
| Any biologic | 9.08<br>(7.92, 10.2) | 9.11<br>(7.09, 11.1) | 5.60<br>(2.17, 9.03) | 9.45<br>(7.93, 11.0) |
|--------------|----------------------|----------------------|----------------------|----------------------|

IMID = Immune-mediated inflammatory disease; IBD = inflammatory bowel disease; MS = multiple sclerosis; RA = rheumatoid arthritis; MAD= mood or anxiety disorder; a-IMID\*MAD interaction -1.38 (-2.26, -0.50); b-IBD\* MAD interaction -1.43 (-2.90, 0.05); c-MS\* MAD interaction 0.08 (-1.97, 2.13); d-RA\* MAD interaction -1.89 (-3.16, -0.63)

Confidential



Table 3. Association of immune-mediated inflammatory disease (IMID), depressive disorder, and uptake of influenza vaccination (Percentage; 95% confidence interval)

| Variable                                           | IMID                              | IBD                               | MS                                | RA                                |
|----------------------------------------------------|-----------------------------------|-----------------------------------|-----------------------------------|-----------------------------------|
| Cohort effect, absent a depressive disorder effect | 6.08<br>(5.49, 6.66)              | 6.81<br>(5.82, 7.80)              | 5.81<br>(4.45, 7.18)              | 5.52<br>(4.65, 6.38)              |
| Depressive disorder effect absent a cohort effect  | 4.15<br>(3.75, 4.56)              | 5.11<br>(4.40, 5.82)              | 4.28<br>(3.39, 5.17)              | 3.41<br>(2.82, 4.00)              |
| Joint effect (cohort & depressive disorder)*       | 5.09 <sup>a</sup><br>(4.29, 5.90) | 5.78 <sup>b</sup><br>(4.30, 7.26) | 8.24 <sup>c</sup><br>(6.52, 9.96) | 2.99 <sup>d</sup><br>(1.83, 4.14) |
| Age                                                |                                   |                                   |                                   |                                   |
| 18-24                                              | 0                                 | 0                                 | 0                                 | 0                                 |
| 25-44                                              | 6.36<br>(5.83, 6.89)              | 5.87<br>(5.24, 6.51)              | 7.33<br>(5.90, 8.77)              | 5.74<br>(4.58, 6.90)              |
| 45-64                                              | 15.5<br>(14.9, 16.0)              | 14.4<br>(13.7, 15.1)              | 15.7<br>(14.2, 17.1)              | 15.2<br>(14.0, 16.4)              |
| ≥65                                                | 33.8<br>(33.1, 34.4)              | 34.3<br>(33.4, 35.2)              | 33.2<br>(31.6, 34.9)              | 32.6<br>(31.4, 33.8)              |
| Sex                                                |                                   |                                   |                                   |                                   |
| Male                                               | 0                                 | 0                                 | 0                                 | 0                                 |
| Female                                             | 5.19<br>(4.87, 5.52)              | 5.12<br>(4.62, 5.63)              | 3.96<br>(3.21, 4.72)              | 4.80<br>(4.28, 5.32)              |
| Region                                             |                                   |                                   |                                   |                                   |
| Rural                                              | 0                                 | 0                                 | 0                                 | 0                                 |
| Urban                                              | 2.28<br>(1.95, 2.61)              | 1.99<br>(1.47, 2.52)              | 2.47<br>(1.71, 3.23)              | 2.67<br>(2.17, 3.16)              |
| Socioeconomic status                               |                                   |                                   |                                   |                                   |
| Quintile 1 (lowest)                                | -4.71<br>(-5.21, -4.20)           | -4.69<br>(-5.51, -3.87)           | -3.41<br>(-4.56, -2.27)           | -6.03<br>(-6.82, -5.25)           |
| Quintile 2                                         | -3.81<br>(-4.32, -3.29)           | -4.15<br>(-4.94, -3.36)           | -3.57<br>(-4.58, -2.45)           | -4.02<br>(-4.85, -3.19)           |
| Quintile 3                                         | -3.14<br>(-3.65, -2.62)           | -3.47<br>(-4.26, -2.68)           | -2.83<br>(-3.94, -1.72)           | -3.40<br>(-4.24, -2.56)           |
| Quintile 4                                         | -2.27<br>(-2.77, -1.77)           | -2.19<br>(-2.97, -0.64)           | -2.29<br>(-3.38, -1.19)           | -2.66<br>(-3.48, -1.84)           |
| Quintile 5 (highest)                               | 0                                 | 0                                 | 0                                 | 0                                 |
| Comorbidity                                        |                                   |                                   |                                   |                                   |
| 0                                                  | 0                                 | 0                                 | 0                                 | 0                                 |
| 1                                                  | 4.86<br>(4.41, 5.31)              | 3.53<br>(2.80, 4.27)              | 3.89<br>(2.79, 4.98)              | 5.73<br>(5.09, 6.37)              |
| ≥2                                                 | 8.73<br>(7.65, 9.80)              | 8.65<br>(6.62, 10.7)              | 9.04<br>(6.18, 11.9)              | 8.41<br>(7.02, 9.79)              |
| IMID-specific procedure                            | 4.96<br>(4.23, 5.69)              | 6.95<br>(5.63, 8.27)              | -                                 | 4.01<br>(3.13, 4.89)              |
| Immune therapy                                     |                                   |                                   |                                   |                                   |
| None                                               | 0                                 | 0                                 | 0                                 | 0                                 |
| Anti-inflammatory/immune-modulatory therapy        | 3.10<br>(2.74, 3.47)              | 2.97<br>(2.40, 3.54)              | 4.40<br>(2.51, 6.29)              | 3.06<br>(2.57, 3.55)              |

1  
2  
3  
4  
5  
6  
7  
8  
9  
10  
11  
12  
13  
14  
15  
16  
17  
18  
19  
20  
21  
22  
23  
24  
25  
26  
27  
28  
29  
30  
31  
32  
33  
34  
35  
36  
37  
38  
39  
40  
41  
42  
43  
44  
45  
46  
47  
48  
49  
50  
51  
52  
53  
54  
55  
56  
57  
58  
59  
60

Any biologic

9.08  
(7.92, 10.2)

9.08  
(7.06, 11.1)

5.54  
(2.11, 8.96)

9.46  
(7.94, 11.0)

---

IMID = Immune-mediated inflammatory disease; IBD = inflammatory bowel disease; MS = multiple sclerosis; RA = rheumatoid arthritis; a-IMID\*Depression interaction -0.98 (-1.93, -0.04); b-IBD\* Depression interaction -1.03 (-2.70, 0.64); c-MS\* Depression interaction 2.43 (0.36, 4.49); d-RA\* Depression interaction -2.53 (-3.88, -1.18)

Confidential

Table 4. Association of immune-mediated inflammatory disease (IMID), anxiety disorder and uptake of influenza vaccination (Percentage; 95% confidence interval)

| Variable                                         | IMID                              | IBD                               | MS                                | RA                                |
|--------------------------------------------------|-----------------------------------|-----------------------------------|-----------------------------------|-----------------------------------|
| Cohort effect, absent an anxiety disorder effect | 6.58<br>(5.96, 7.19)              | 6.89<br>(5.86, 7.91)              | 7.78<br>(6.35, 9.21)              | 5.72<br>(4.80, 6.64)              |
| Anxiety disorder effect absent a cohort effect   | 4.41<br>(4.05, 4.77)              | 4.93<br>(4.32, 5.53)              | 4.95<br>(4.65, 5.75)              | 3.75<br>(3.22, 4.27)              |
| Joint effect (cohort & anxiety disorder)*        | 4.84 <sup>a</sup><br>(4.12, 5.56) | 6.10 <sup>b</sup><br>(4.81, 7.40) | 6.25 <sup>c</sup><br>(6.52, 9.96) | 3.37 <sup>d</sup><br>(2.34, 4.40) |
| Age                                              |                                   |                                   |                                   |                                   |
| 18-24                                            | 0                                 | 0                                 | 0                                 | 0                                 |
| 25-44                                            | 6.22<br>(5.70, 6.74)              | 5.72<br>(5.09, 6.35)              | 7.12<br>(5.67, 8.58)              | 5.62<br>(4.47, 6.77)              |
| 45-64                                            | 15.2<br>(14.7, 15.8)              | 14.1<br>(13.4, 14.8)              | 15.4<br>(13.9, 16.8)              | 15.0<br>(13.9, 16.2)              |
| ≥65                                              | 33.4<br>(32.8, 34.0)              | 33.9<br>(33.0, 34.8)              | 32.8<br>(31.2, 34.5)              | 32.4<br>(31.2, 33.6)              |
| Sex                                              |                                   |                                   |                                   |                                   |
| Male                                             | 0                                 | 0                                 | 0                                 | 0                                 |
| Female                                           | 5.10<br>(4.78, 5.42)              | 5.06<br>(4.55, 5.57)              | 3.86<br>(3.10, 4.62)              | 4.69<br>(4.17, 5.21)              |
| Region                                           |                                   |                                   |                                   |                                   |
| Rural                                            | 0                                 | 0                                 | 0                                 | 0                                 |
| Urban                                            | 2.20<br>(1.87, 2.53)              | 1.91<br>(1.38, 2.43)              | 2.32<br>(1.56, 3.09)              | 2.59<br>(2.09, 3.09)              |
| Socioeconomic status                             |                                   |                                   |                                   |                                   |
| Quintile 1 (lowest)                              | -4.70<br>(-5.21, -4.20)           | -4.69<br>(-5.51, -3.87)           | -3.30<br>(-4.44, -2.15)           | -6.05<br>(-6.84, -5.27)           |
| Quintile 2                                       | -3.73<br>(-4.24, -3.22)           | -4.04<br>(-4.82, -3.25)           | -3.40<br>(-4.52, -2.29)           | -4.00<br>(-4.82, -3.17)           |
| Quintile 3                                       | -3.06<br>(-3.57, -2.54)           | -3.35<br>(-4.14, -2.57)           | -2.70<br>(-3.81, -1.58)           | -3.37<br>(-4.20, -2.53)           |
| Quintile 4                                       | -2.24<br>(-2.75, -1.74)           | -2.15<br>(-2.972, -1.38)          | -2.16<br>(-3.52, -1.06)           | -2.67<br>(-3.49, -1.84)           |
| Quintile 5 (highest)                             | 0                                 | 0                                 | 0                                 | 0                                 |
| Comorbidity                                      |                                   |                                   |                                   |                                   |
| 0                                                | 0                                 | 0                                 | 0                                 | 0                                 |
| 1                                                | 4.81<br>(4.36, 5.26)              | 3.46<br>(2.72, 4.20)              | 3.86<br>(2.76, 4.96)              | 5.68<br>(5.04, 6.33)              |
| ≥2                                               | 8.75<br>(7.68, 9.83)              | 8.68<br>(6.65, 10.7)              | 9.17<br>(6.31, 12.0)              | 8.40<br>(7.02, 9.79)              |
| IMID-specific procedure                          | 4.98<br>(4.26, 5.71)              | 6.91<br>(5.59, 8.23)              | -                                 | 4.04<br>(3.17, 4.92)              |
| Immune therapy                                   |                                   |                                   |                                   |                                   |
| None                                             | 0                                 | 0                                 | 0                                 | 0                                 |
| Anti-inflammatory/immune-modulatory therapy      | 3.09<br>(2.72, 3.45)              | 2.97<br>(2.40, 3.53)              | 4.48<br>(2.58, 6.37)              | 3.06<br>(2.57, 3.55)              |

1  
2  
3  
4  
5  
6  
7  
8  
9  
10  
11  
12  
13  
14  
15  
16  
17  
18  
19  
20  
21  
22  
23  
24  
25  
26  
27  
28  
29  
30  
31  
32  
33  
34  
35  
36  
37  
38  
39  
40  
41  
42  
43  
44  
45  
46  
47  
48  
49  
50  
51  
52  
53  
54  
55  
56  
57  
58  
59  
60

Any biologic

9.10

9.17

5.77

9.46

(7.95, 10.3)

(7.15, 11.2)

(2.31, 9.24)

(7.93, 11.0)

---

IMID = Immune-mediated inflammatory disease; IBD = inflammatory bowel disease; MS = multiple sclerosis; RA = rheumatoid arthritis; a-IMID\*anxiety interaction -0.74 (-2.62, -0.86); b-IBD\* anxiety interaction -0.78 (-2.27, 0.71); c-MS\* anxiety interaction 2.43 (0.36, 4.49); d-RA\*anxiety interaction -2.35 (-3.62, -1.07)

Confidential

Figure 1. Percentage of persons in the immune-mediated inflammatory disease (IMID) and matched cohorts who received an influenza vaccination stratified by psychiatric comorbidity status, 1984-2015<sup>a</sup>

a-2016 not presented as data available for only first quarter

Confidential

1  
2  
3  
4  
5  
6  
7  
8  
9  
10  
11  
12  
13  
14  
15  
16  
17  
18  
19  
20  
21  
22  
23  
24  
25  
26  
27  
28  
29  
30  
31  
32  
33  
34  
35  
36  
37  
38  
39  
40  
41  
42  
43  
44  
45  
46  
47  
48  
49  
50  
51  
52  
53  
54  
55  
56  
57  
58  
59  
60

Figure 2. Age and sex-standardized percentage of persons in the immune-mediated inflammatory disease (IMID) and matched cohorts who received an influenza vaccination, 1984-2015<sup>a</sup>

Arrows indicate changes in groups eligible for provincial (public funding): 1999- age ≥65 years, chronic conditions, health care workers; 2004- children aged 6-23 months and their families; 2005- chronic respiratory diseases; 2007- pregnant women; 2009 – H1N1 epidemic; 2010- universal coverage; 2014- pharmacists able to administer influenza vaccine; a-2016 not presented as data available for only first quarter

Confidential

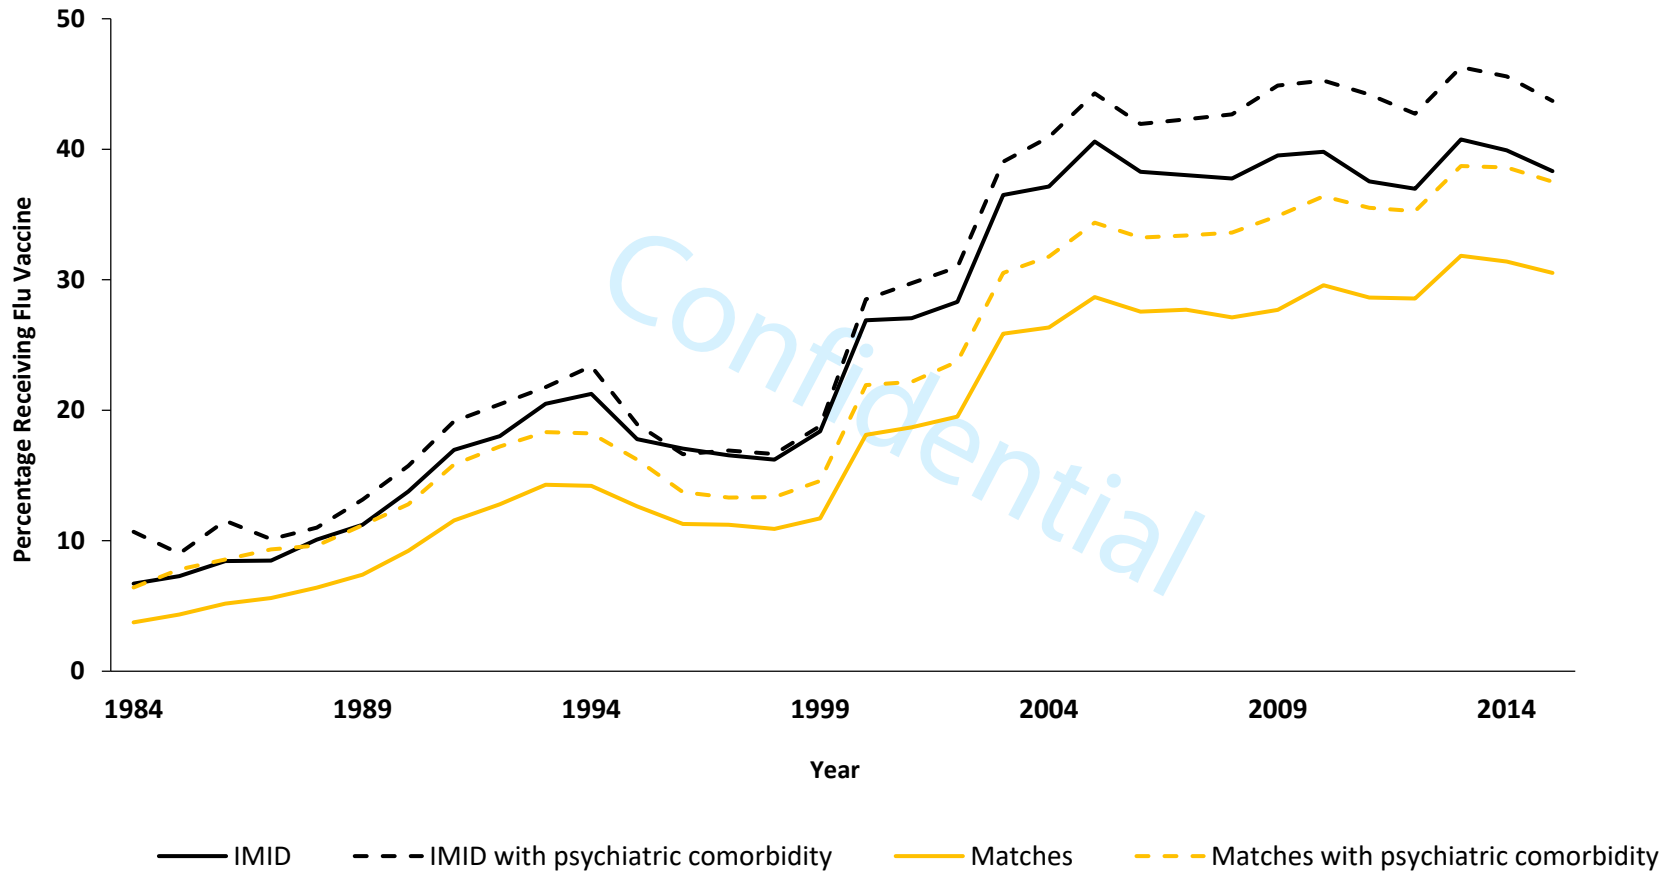

1  
2  
3  
4  
5  
6  
7  
8  
9  
10  
11  
12  
13  
14  
15  
16  
17  
18  
19  
20  
21  
22  
23  
24  
25  
26  
27  
28  
29  
30  
31  
32  
33  
34  
35  
36  
37  
38  
39  
40  
41

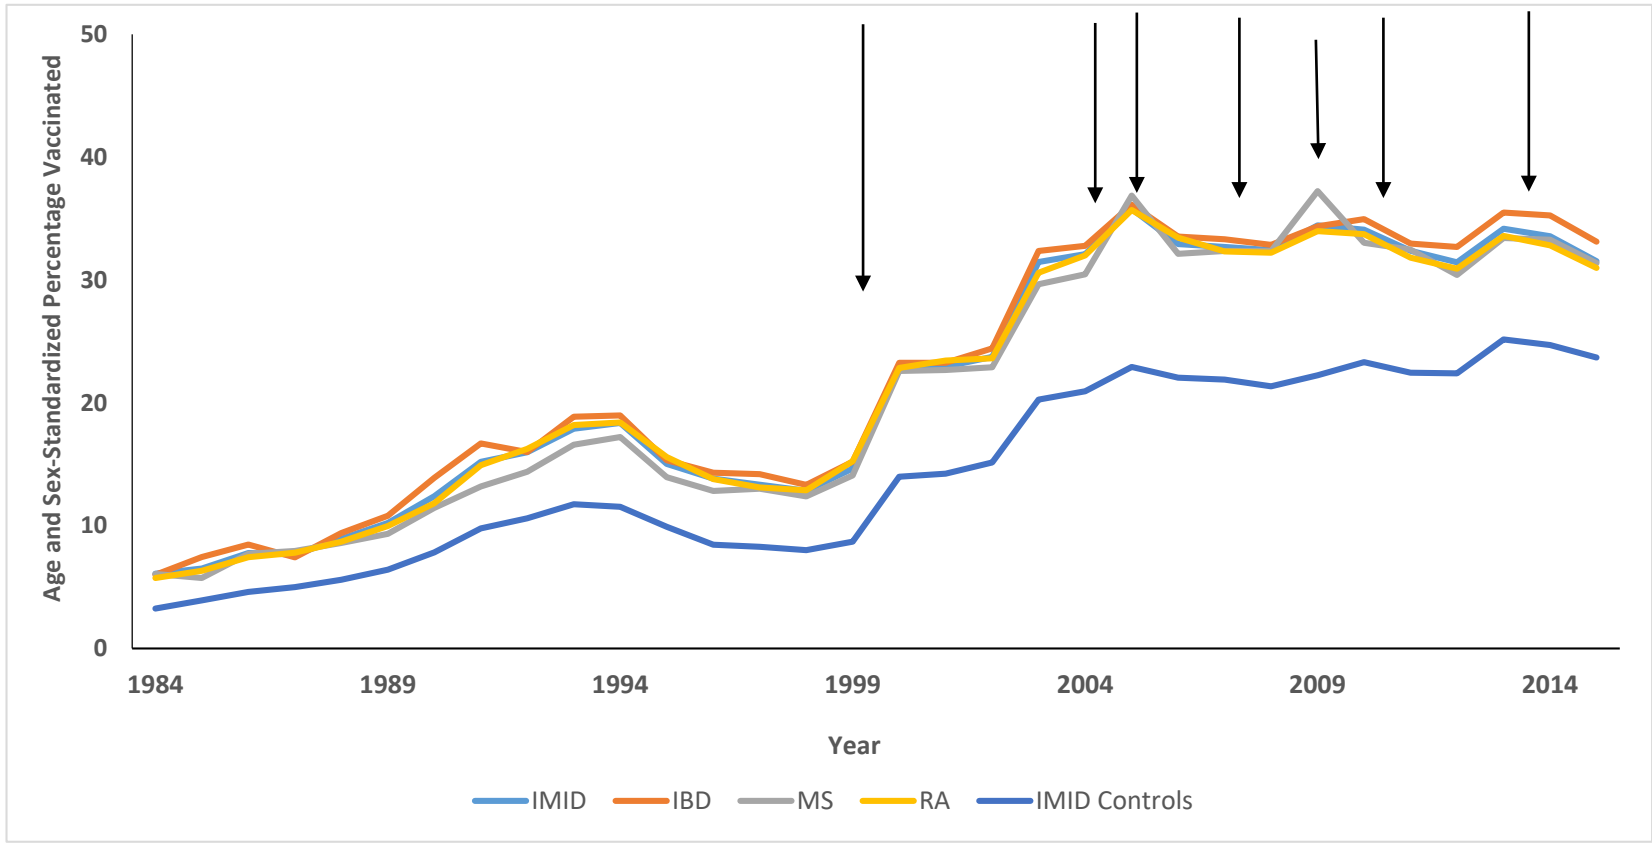



Table e-1 Tariff and procedure codes to identify surgeries for inflammatory bowel disease

| <b>Procedure</b>                              | <b>Physician Claim Tariff Codes</b>                                                          |
|-----------------------------------------------|----------------------------------------------------------------------------------------------|
| Intestinal suture                             | 3221, 3223                                                                                   |
| Colostomy                                     | 3195                                                                                         |
| Colectomy                                     | 3179                                                                                         |
| Colectomy, proctectomy                        | 3180, 3181, 3182, 3183, 3184                                                                 |
| Proctosigmoidectomy                           | 3286                                                                                         |
| Proctosigmoidectomy, proctectomy              | 3288, 3289, 3290                                                                             |
| Rectal surgery                                | 3301                                                                                         |
| Small bowel resection                         | 3201, 3174                                                                                   |
| Ileostomy                                     | 3193                                                                                         |
|                                               | <b>Hospital Procedures</b>                                                                   |
| Incision, excision & anastomosis of intestine | 45, excluding 451 & 452<br>diagnostic procedures<br>1NM – colon + 59, 87, 89, 92<br>excision |

Table e-2 Diagnostic and procedure codes to identify joint-related procedures for rheumatoid arthritis

| Procedure                                         | ICD-9-CM code              | CCI code                                                                           |
|---------------------------------------------------|----------------------------|------------------------------------------------------------------------------------|
| Hip replacement (incl. Partial, total, revisions) | 81.50, 81.51, 81.53, 81.52 | 1.VA.53.LA-PN^^ or<br>1.VA.53.PN-PN^^<br><br>1.VA.53.LA-PM^^ or<br>1.VA.53.PN-PM^^ |
| Knee replacement                                  | 81.54, 81.55               | 1.VG.53.LA-PN or 1.VG.53.LA-PP                                                     |
| Elbow replacement                                 | 81.84                      | 1.TM.80.^^                                                                         |
| Shoulder replacement                              | 81.80, 81.81, 81.83        | 1.TA.53.^^                                                                         |
| Wrist fusion                                      | 81.25, 81.26               | 1.UB.75.^^, 1.UG.75.^^                                                             |
| Ankle fusion                                      | 81.1                       | 1.WA.75.^^                                                                         |
| Foot joint fusion                                 | 81.1                       | 1.WE.75.^^                                                                         |
| Foot joint replacement                            | 81.57                      | 1.WJ.53.^^                                                                         |
| Cervical spine fusion                             | 81.01, 81.02, 81.03        | 1.SA.75.^^                                                                         |
| Hand joint replacement                            | 81.7                       | 1.UC.53.^^, 1.UC.55. ^^                                                            |

ICD-9-CM = International Classification of Diseases, 9<sup>th</sup> revision, Clinical Modification; CCI = Canadian Classification of Intervention code. ^ CCI codes are 10 characters long and broken into components. The first number in the code followed by 2 letters indicates anatomical location or development stage. Subsequent codes provide more specific information about the intervention. The ^ indicates that all of the codes with more specific indicators were included.

Table e-3

| Treatment<br>Disease                                       | Inflammatory Bowel Disease   | Multiple Sclerosis            | Rheumatoid Arthritis            |
|------------------------------------------------------------|------------------------------|-------------------------------|---------------------------------|
| <b>Corticosteroids<sup>1</sup></b>                         | Methylprednisolone (H02AB04) | Methylprednisolone (H02AB04)  | Methylprednisolone (H02AB04)    |
|                                                            | Prednisolone (H02AB06)       | Prednisolone (H02AB06)        | Prednisolone (H02AB06)          |
|                                                            | Prednisone (H02AB07)         | Prednisone (H02AB07)          | Prednisone (H02AB07)            |
|                                                            | Budesonide                   |                               | Triamcinolone (H02AB08)         |
|                                                            | Hydrocortisone (enema)       |                               | Cortisone (H02AB10))            |
| <b>Anti-inflammatory or</b>                                | 5-ASA (A07EC02, A07EC03)     | Glatiramer acetate (L03AX13)  | Sulfasalazine (A07EC01)         |
| <b>Immunomodulatory therapies<sup>2</sup></b>              | Sulfasalazine (A07EC01)      | Interferon-beta 1a (L03AB07)  | Sodium aurothiomalate (M01CB01) |
|                                                            |                              | Interferon-beta 1b (L03AB08)  | Auranofin (M01CB03)             |
|                                                            |                              | Dimethyl fumarate (N07XX09)   | Aurothioglucose (M01CB04)       |
|                                                            |                              | Teriflunomide (L04AA31)       | Penicillamine (M01CC01)         |
|                                                            |                              | Peg interferon-beta (L03AB13) | Hydroxychloroquine (P01BA02)    |
| <b>Traditional immunosuppressive therapies<sup>3</sup></b> | Azathioprine (L04AX01)       | Azathioprine (L04AX01)        | Azathioprine (L04AX01)          |
|                                                            | Methotrexate (L04AX03)       | Methotrexate (L04AX03)        | Methotrexate (L04AX03)          |
|                                                            | 6-mercaptopurine (L01BB02)   | Mitoxantrone (L01DB07)        | Cyclophosphamide (L01AA01)      |
|                                                            | Cyclosporine (L04AA01)       | Cyclophosphamide (L01AA01)    | Cyclosporine (L04AA01)          |

1  
2  
3  
4  
5  
6  
7  
8  
9  
10  
11  
12  
13  
14  
15  
16  
17  
18  
19  
20  
21  
22  
23  
24  
25  
26  
27  
28  
29  
30  
31  
32  
33  
34  
35  
36  
37  
38  
39  
40  
41  
42  
43  
44  
45  
46  
47

---

|                                               |                       |                                    |                        |
|-----------------------------------------------|-----------------------|------------------------------------|------------------------|
|                                               | Tacrolimus (L04AD02)  |                                    | Leflunomide (L04AA13)  |
| <b>Novel therapies/ Biologics<sup>3</sup></b> | Infliximab (L04AA12)  | Natalizumab (L04AA23)              | Infliximab (L04AA12)   |
|                                               | adalimumab (L04AA17)  | Fingolimod (L04AA27)               | adalimumab (L04AA17)   |
|                                               | Golimumab (L04AB06)   | Alemtuzumab (L04AA34)              | Etanercept (L04AA11)   |
|                                               | Ustekinumab (L04AC05) | Cladribine <sup>4</sup> (L04AA40)  | Anakinra (L04AA14)     |
|                                               | Vedolizumab (L04AA33) | Ocrelizumab <sup>4</sup> (L04AA36) | Rituximab (L01XC02)    |
|                                               |                       |                                    | Abatacept (L04AA24)    |
|                                               |                       |                                    | Tocilizumab (L04AC07)  |
|                                               |                       |                                    | Tofacitinib (L04AA29)  |
|                                               |                       |                                    | Golimumab (L04AB06)    |
|                                               |                       |                                    | Certolizumab (L04AB05) |

---

1- Corticosteroids were not included as immune therapies for MS because they are not used as an chronic therapy, but exclusively for episodic treatment of relapses. 2- Therapies in this row in the MS column were considered first-line. 3- Therapies in this row in the MS column were considered second-line. 4- Not available during the study period.

Figure e1. Percentage of the IMID and matched cohorts immunized against influenza in 2015 stratified by age group

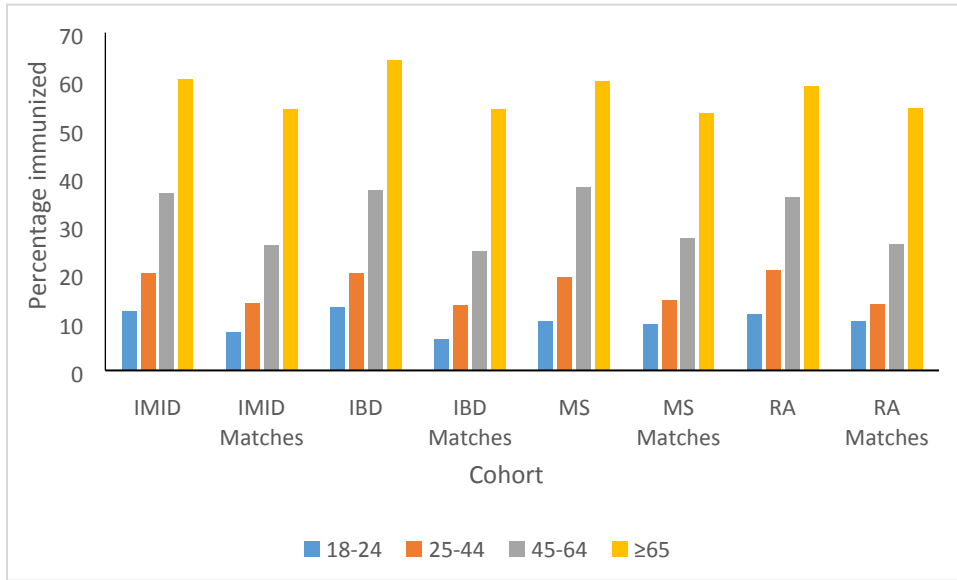

Confidential
